# Supplementary material
Source: PubMed Central journal article supplement (PMC3878695)
Supplement: CJN.02730313_CJN02730313SupplementaryData.pdf [file CJN.02730313_CJN02730313SupplementaryData.pdf]

## APPENDIX

### 1. Exclusion criteria

| Exclusion criteria       | ICD-9-CM code               | CPT code                   |
|--------------------------|-----------------------------|----------------------------|
| End stage kidney disease | 585.6                       | 90970                      |
| Kidney transplantation   | 55.61, 55.69, 996.81, V42.0 | 50360, 50365, 50370, 50380 |

### 2. Diagnosis

| Diagnosis                                       | ICD-9-CM code                                                                                                                             |
|-------------------------------------------------|-------------------------------------------------------------------------------------------------------------------------------------------|
| Congestive heart failure                        | 398.91, 402.11, 402.91, 404.11, 404.13, 404.91, 404.93, 428.0-428.9                                                                       |
| Cardiac arrhythmias                             | 426.10, 426.11, 426.13, 426.2-426.53, 426.6-426.89, 427.0, 427.2, 427.31, 427.60, 427.9, 785.0, V45.0, V53.3                              |
| Valvular disease                                | 093.20-093.24, 394.0-397.1, 424.0-424.91, 746.3-746.6, V42.2, V43.3                                                                       |
| Pulmonary circulation disorders                 | 416.0-416.9, 417.9                                                                                                                        |
| Peripheral vascular disorders                   | 440.0-440.9, 441.2, 441.4, 441.7, 441.9, 443.1-443.9, 447.1, 557.1, 557.9, V43.4                                                          |
| Hypertension                                    | 401.1, 401.9, 402.10, 402.90, 404.10, 404.90, 405.11, 405.19, 405.91, 405.99                                                              |
| Paralysis                                       | 342.0-342.12, 342.9-344.9                                                                                                                 |
| Other neurological disorders                    | 331.9, 332.0, 333.4, 333.5, 334.0-335.9, 340, 341.1-341.9, 345.00-345.11, 345.40-345.51, 345.80-345.91, 348.1, 348.3, 780.3, 784.3        |
| Diabetes, uncomplicated                         | 250.00-250.33                                                                                                                             |
| Diabetes, complicated                           | 250.40-250.73, 250.90-250.93                                                                                                              |
| Hypothyroidism                                  | 243-244.2, 244.8, 244.9                                                                                                                   |
| Liver disease                                   | 070.32, 070.33, 070.54, 456.0, 456.1, 456.20, 456.21, 571.0, 571.2, 571.3, 571.40-571.49, 571.5, 571.6, 571.8, 571.9, 572.3, 572.8, V42.7 |
| Peptic ulcer disease excluding bleeding         | 531.70, 531.90, 532.70, 532.90, 533.70, 533.90, 534.70, 534.90, V12.71                                                                    |
| AIDS                                            | 042-044.9                                                                                                                                 |
| Lymphoma                                        | 200.00-202.38, 202.50-203.01, 203.8-203.81, 238.6, 273.3, V10.71, V10.72, V10.79                                                          |
| Metastatic cancer                               | 196.0-199.1                                                                                                                               |
| Solid tumor without metastasis                  | 140.0-172.9, 174.0-175.9, 179-195.8, V10.00-V10.9                                                                                         |
| Rheumatoid arthritis/collagen vascular diseases | 701.0, 710.0-710.9, 714.0-714.9, 720.0-720.9, 725                                                                                         |
| Coagulopathy                                    | 286.0-286.9, 287.1, 287.3-287.5                                                                                                           |
| Obesity                                         | 278.0                                                                                                                                     |
| Weight loss                                     | 260-263.9                                                                                                                                 |
| Fluid and electrolyte disorders                 | 276.0-276.9                                                                                                                               |
| Blood loss anemia                               | 280.0                                                                                                                                     |
| Deficiency anemias                              | 280.1-281.9, 285.9                                                                                                                        |
| Drug abuse                                      | 292.0, 292.82-292.89, 292.9, 304.00-304.93, 305.20-305.93                                                                                 |
| Psychoses                                       | 295.00-298.9, 299.10-299.11                                                                                                               |
| Depression                                      | 300.4, 301.12, 309.0, 309.1, 311                                                                                                          |

|                                   |                                                                   |
|-----------------------------------|-------------------------------------------------------------------|
| Acute myocardial infarction       | 410.0-410.9                                                       |
| Sepsis                            | 038.0-038.9, 020.2, 112.5, 112.81, 790.7                          |
| Pneumonia                         | 480.0-480.9, 481, 482.0-482.9, 483.0-483.8, 484.1-484.8, 485, 486 |
| Chronic kidney disease            | 582.0-582.9, 583.0-583.9, 585.1-585.9, 586, 588.0-588.9           |
| Hypertensive disease in pregnancy | 642.0-642.9                                                       |

### 3. Procedures

| Procedures             | ICD-9-CM code                                                                                                                                                                                                                                                                                                                                                                                                                                                                | CPT code                                                                                                                                                                                                                                                                                                                                                                                                                                                                                                                                                                                                                               |
|------------------------|------------------------------------------------------------------------------------------------------------------------------------------------------------------------------------------------------------------------------------------------------------------------------------------------------------------------------------------------------------------------------------------------------------------------------------------------------------------------------|----------------------------------------------------------------------------------------------------------------------------------------------------------------------------------------------------------------------------------------------------------------------------------------------------------------------------------------------------------------------------------------------------------------------------------------------------------------------------------------------------------------------------------------------------------------------------------------------------------------------------------------|
| Hemodialysis           | 39.95                                                                                                                                                                                                                                                                                                                                                                                                                                                                        | 90935, 90937                                                                                                                                                                                                                                                                                                                                                                                                                                                                                                                                                                                                                           |
| Peritoneal dialysis    | 54.98                                                                                                                                                                                                                                                                                                                                                                                                                                                                        |                                                                                                                                                                                                                                                                                                                                                                                                                                                                                                                                                                                                                                        |
| Other dialysis         |                                                                                                                                                                                                                                                                                                                                                                                                                                                                              | 90945, 90947, 90999                                                                                                                                                                                                                                                                                                                                                                                                                                                                                                                                                                                                                    |
| Critical care          |                                                                                                                                                                                                                                                                                                                                                                                                                                                                              | 99291, 99292                                                                                                                                                                                                                                                                                                                                                                                                                                                                                                                                                                                                                           |
| Mechanical ventilation |                                                                                                                                                                                                                                                                                                                                                                                                                                                                              | 94002, 94656, 94003, 94657, 94660                                                                                                                                                                                                                                                                                                                                                                                                                                                                                                                                                                                                      |
| HSCT                   | 41.0                                                                                                                                                                                                                                                                                                                                                                                                                                                                         | 38240, 38241                                                                                                                                                                                                                                                                                                                                                                                                                                                                                                                                                                                                                           |
| Cardiac surgery        | 35.10, 35.11, 35.12, 35.13, 35.14, 35.20, 35.21, 35.22, 35.23, 35.24, 35.25, 35.26, 35.27, 35.28, 35.42, 35.51, 35.53, 35.54, 35.55, 35.60, 35.61, 35.62, 35.81, 35.82, 35.92, 35.93, 35.94, 35.95, 35.99, 36.03, 36.10, 36.11, 36.12, 36.13, 36.14, 36.15, 36.16, 36.17, 36.19, 36.2, 36.31, 36.33, 36.9, 36.91, 37.10, 37.11, 37.12, 37.31, 37.33, 37.34, 37.36, 37.4, 37.49, 37.51, 37.9, 39.63                                                                           | 32660, 33020, 33025, 33030, 33031, 33050, 33120, 33130, 33140, 33141, 33201, 33236, 33237, 33243, 33245, 33246, 33250, 33253, 33259, 33261, 33300, 33305, 33310, 33315, 33400, 33403, 33405, 33406, 33410, 33411, 33412, 33413, 33414, 33415, 33422, 33425, 33426, 33427, 33430, 33460, 33463, 33464, 33465, 33474, 33475, 33500, 33502, 33504, 33506, 33510, 33511, 33512, 33513, 33514, 33517, 33518, 33519, 33521, 33522, 33523, 33530, 33530, 33533, 33534, 33535, 33536, 33542, 33545, 33572, 33600, 33602, 33612, 33641, 33647, 33660, 33681, 33702, 33710, 33720, 33730, 33732, 33774, 33820, 33824, 33917, 33922, 33945, 33999 |
| Thoracic surgery       | 01.32, 07.80, 07.83, 07.84, 31.21, 32.1, 32.21, 32.22, 32.23, 32.29, 32.30, 32.39, 32.4, 32.41, 32.50, 32.59, 32.6, 32.9, 33.1, 33.20, 33.25, 33.31, 33.34, 33.39, 33.41, 33.42, 33.48, 33.49, 33.50, 33.51, 33.53, 33.93, 33.98, 33.98, 33.99, 34.02, 34.03, 34.05, 34.06, 34.09, 34.1, 34.20, 34.22, 34.26, 34.3, 34.4, 34.51, 34.52, 34.59, 34.73, 34.79, 34.81, 34.82, 34.84, 34.85, 34.89, 34.91, 34.92, 34.93, 34.99, 40.64, 42.42, 42.51, 42.52, 42.53, 42.54, 42.55, | 19260, 19271, 19272, 20101, 21600, 21615, 21630, 32035, 32036, 32095, 32100, 32110, 32120, 32124, 32140, 32141, 32150, 32151, 32160, 32200, 32201, 32220, 32225, 32310, 32320, 32402, 32440, 32442, 32445, 32480, 32482, 32484, 32486, 32488, 32491, 32500, 32520, 32522, 32525, 32601, 32602, 32604, 32605, 32606, 32650, 32651, 32652, 32653, 32654, 32655, 32656, 32657, 32658, 32659, 32660, 32661, 32662, 32663, 32664, 32665, 32810, 32815, 32851, 32852, 32853, 32854, 32905, 32906, 32940, 35820, 35905, 38746, 39000, 39010, 39200, 39220, 39400, 39560, 39561, 43101,                                                        |

|                   |                                                                                                                                                                                                                                                                                                                                                                                                                                                                                                                                                                                                                                                                                                                                                                                                                                                                                                                                                                                                                                                                                                                                                                                                                                                                                                                                                                                             |                                                                                                                                                                                                                                                                                                                                                                                                                                                                                                                                                                                                                                                                                                                                                                                                                                                                                                                                                                                                                                                                                                                                                                                                                                                                                                                                                                                                                                                                                                                                                   |
|-------------------|---------------------------------------------------------------------------------------------------------------------------------------------------------------------------------------------------------------------------------------------------------------------------------------------------------------------------------------------------------------------------------------------------------------------------------------------------------------------------------------------------------------------------------------------------------------------------------------------------------------------------------------------------------------------------------------------------------------------------------------------------------------------------------------------------------------------------------------------------------------------------------------------------------------------------------------------------------------------------------------------------------------------------------------------------------------------------------------------------------------------------------------------------------------------------------------------------------------------------------------------------------------------------------------------------------------------------------------------------------------------------------------------|---------------------------------------------------------------------------------------------------------------------------------------------------------------------------------------------------------------------------------------------------------------------------------------------------------------------------------------------------------------------------------------------------------------------------------------------------------------------------------------------------------------------------------------------------------------------------------------------------------------------------------------------------------------------------------------------------------------------------------------------------------------------------------------------------------------------------------------------------------------------------------------------------------------------------------------------------------------------------------------------------------------------------------------------------------------------------------------------------------------------------------------------------------------------------------------------------------------------------------------------------------------------------------------------------------------------------------------------------------------------------------------------------------------------------------------------------------------------------------------------------------------------------------------------------|
|                   | 42.58, 42.59, 53.81                                                                                                                                                                                                                                                                                                                                                                                                                                                                                                                                                                                                                                                                                                                                                                                                                                                                                                                                                                                                                                                                                                                                                                                                                                                                                                                                                                         | 43112, 43113, 43130, 43135, 43415, 60520, 60521, 60522, 64746, 64752, 64809                                                                                                                                                                                                                                                                                                                                                                                                                                                                                                                                                                                                                                                                                                                                                                                                                                                                                                                                                                                                                                                                                                                                                                                                                                                                                                                                                                                                                                                                       |
| Abdominal surgery | 07.12, 07.21, 07.22, 07.29, 07.3, 07.44, 17.35, 40.52, 40.53, 41.2, 41.41, 41.42, 41.43, 41.5, 42.09, 42.11, 42.19, 42.21, 42.22, 42.23, 42.25, 42.31, 42.32, 42.40, 42.41, 42.42, 42.54, 42.59, 42.62, 42.64, 42.65, 42.68, 42.69, 42.7, 42.83, 42.84, 42.89, 42.91, 42.92, 42.99, 43.0, 43.19, 43.3, 43.42, 43.5, 43.6, 43.7, 43.81, 43.89, 43.99, 44.01, 44.02, 44.15, 44.31, 44.38, 44.39, 44.5, 44.61, 44.62, 44.63, 44.64, 44.65, 44.66, 44.68, 44.95, 44.96, 44.97, 44.98, 45.00, 45.01, 45.02, 45.03, 45.15, 45.26, 45.33, 45.41, 45.41, 45.51, 45.52, 45.61, 45.62, 45.63, 45.74, 45.76, 45.79, 45.81, 45.82, 45.83, 45.91, 45.93, 45.95, 45.95, 46.01, 46.03, 46.10, 46.11, 46.13, 46.14, 46.23, 46.31, 46.32, 46.39, 46.41, 46.43, 46.51, 46.60, 46.62, 46.63, 46.64, 46.72, 46.74, 46.76, 46.76, 46.79, 46.80, 46.81, 46.82, 46.9, 46.93, 46.94, 47.01, 47.09, 47.01, 47.11, 47.19, 47.2, 47.91, 48.0, 48.1, 48.25, 48.35, 48.49, 48.49, 48.59, 48.59, 48.62, 48.73, 48.75, 48.79, 48.9, 49.51, 49.74, 50.0, 50.12, 50.13, 50.21, 50.22, 50.3, 50.4, 50.61, 50.69, 50.91, 50.92, 50.93, 50.94, 50.99, 51.04, 51.13, 51.21, 51.22, 51.23, 51.36, 51.37, 51.39, 51.41, 51.42, 51.49, 51.51, 51.59, 51.61, 51.62, 51.63, 51.69, 51.71, 51.72, 51.79, 51.82, 51.83, 51.90-51.99, 52.09, 52.12, 52.3, 52.4, 52.52, 52.59, 52.6, 52.7, 52.90-52.99, 54.11, 54.19, 54.21, 54.4, 54.51, | 20102, 38100, 38101, 38102, 38120, 38129, 38570, 38571, 38572, 38747, 39560, 39561, 43100, 43101, 43107, 43108, 43112, 43113, 43117, 43121, 43122, 43123, 43124, 43130, 43135, 43280, 43289, 43300, 43305, 43310, 43312, 43324, 43325, 43326, 43330, 43331, 43360, 43361, 43420, 43500, 43501, 43520, 43610, 43611, 43620, 43621, 43631, 43632, 43633, 43635, 43638, 43639, 43640, 43644, 43651, 43652, 43653, 43659, 43770, 43820, 43825, 43830, 43832, 43840, 43848, 43850, 43860, 43870, 43880, 44005, 44010, 44020, 44021, 44025, 44110, 44111, 44120, 44121, 44125, 44130, 44140, 44141, 44143, 44144, 44145, 44146, 44147, 44150, 44151, 44152, 44153, 44155, 44156, 44160, 44180, 44186, 44200, 44201, 44202, 44203, 44204, 44205, 44206, 44207, 44208, 44210, 44211, 44213, 44238, 44239, 44312, 44314, 44320, 44322, 44345, 44620, 44625, 44626, 44640, 44650, 44700, 44800, 44820, 44900, 44950, 44955, 44960, 44970, 45110, 45111, 45112, 45113, 45116, 45119, 45123, 45130, 45136, 45160, 45500, 45505, 45540, 45550, 45562, 45563, 46040, 46060, 47010, 47011, 47120, 47122, 47125, 47130, 47135, 47350, 47360, 47361, 47370, 47379, 47400, 47420, 47480, 47562, 47563, 47564, 47600, 47605, 47610, 47612, 47620, 47711, 47715, 47720, 47740, 47741, 47760, 47780, 47785, 48005, 48120, 48140, 48145, 48146, 48150, 48153, 48154, 48155, 48180, 48510, 48520, 48540, 48545, 49000, 49010, 49020, 49021, 49040, 49041, 49060, 49061, 49255, 49320, 49321, 49329, 49904, 49905, 50130, 51080, 58823, 60540, 60545, 60650, 61711, 74290 |

|                         |                                                                                                                                                                                                                                                                                                                                                                                                                                                                                                                  |                                                                                                                                                                                                                                                                                                                                                                                                                                                                                                                                                                                                                                                                                                                                                                                                                                                                                                                                                                                                                                                                                                                                                                                                                                                                                                                                                                               |
|-------------------------|------------------------------------------------------------------------------------------------------------------------------------------------------------------------------------------------------------------------------------------------------------------------------------------------------------------------------------------------------------------------------------------------------------------------------------------------------------------------------------------------------------------|-------------------------------------------------------------------------------------------------------------------------------------------------------------------------------------------------------------------------------------------------------------------------------------------------------------------------------------------------------------------------------------------------------------------------------------------------------------------------------------------------------------------------------------------------------------------------------------------------------------------------------------------------------------------------------------------------------------------------------------------------------------------------------------------------------------------------------------------------------------------------------------------------------------------------------------------------------------------------------------------------------------------------------------------------------------------------------------------------------------------------------------------------------------------------------------------------------------------------------------------------------------------------------------------------------------------------------------------------------------------------------|
|                         | 54.51, 54.74, 54.75, 54.92,<br>55.11, 55.12, 57.34, 57.6,<br>65.64, 86.4, 96.39                                                                                                                                                                                                                                                                                                                                                                                                                                  |                                                                                                                                                                                                                                                                                                                                                                                                                                                                                                                                                                                                                                                                                                                                                                                                                                                                                                                                                                                                                                                                                                                                                                                                                                                                                                                                                                               |
| Vascular surgery        | 07.43, 35.93, 37.11, 38.01,<br>38.04, 38.05, 38.06, 38.07,<br>38.08, 38.09, 38.10, 38.11,<br>38.12, 38.13, 38.14, 38.15,<br>38.16, 38.18, 38.31, 38.32,<br>38.33, 38.34, 38.35, 38.36,<br>38.38, 38.39, 38.40, 38.41,<br>38.42, 38.43, 38.44, 38.45,<br>38.46, 38.47, 38.48, 38.49,<br>38.60, 38.61, 38.62, 38.63,<br>38.64, 38.65, 38.66, 38.67,<br>38.68, 38.69, 38.7, 38.80,<br>38.81, 38.82, 38.83, 38.84,<br>38.85, 38.86, 38.87, 38.88,<br>38.89, 39.1, 39.21-39.29,<br>39.50-39.59, 39.90-39.99,<br>44.91 | 30915, 30920, 33310, 33315, 33320,<br>33322, 33330, 33335, 33502, 33504,<br>33530, 33774, 33800, 33860, 33861,<br>33863, 33877, 33910, 33915, 33916,<br>33917, 34001, 34051, 34101, 34111,<br>34151, 34201, 34203, 34401, 34421,<br>34451, 34471, 34490, 34812, 34813,<br>34820, 34830, 34831, 34832, 34833,<br>35001, 35002, 35011, 35021, 35022,<br>35045, 35081, 35082, 35091, 35092,<br>35102, 35103, 35111, 35112, 35121,<br>35122, 35131, 35132, 35141, 35142,<br>35151, 35161, 35201, 35206, 35207,<br>35211, 35216, 35221, 35226, 35231,<br>35236, 35241, 35246, 35251, 35256,<br>35261, 35266, 35271, 35276, 35281,<br>35286, 35301, 35311, 35321, 35331,<br>35341, 35351, 35355, 35361, 35371,<br>35372, 35381, 35390, 35501, 35506,<br>35516, 35518, 35521, 35531, 35533,<br>35536, 35546, 35551, 35556, 35558,<br>35560, 35563, 35565, 35566, 35571,<br>35583, 35585, 35601, 35606, 35612,<br>35616, 35621, 35623, 35626, 35631,<br>35636, 35641, 35646, 35647, 35650,<br>35654, 35656, 35661, 35663, 35665,<br>35666, 35671, 35681, 35682, 35683,<br>35691, 35694, 35695, 35700, 35701,<br>35721, 35741, 35761, 35875, 35876,<br>35879, 35881, 37145, 37160, 37181,<br>37565, 37605, 37615, 37616, 37617,<br>37618, 37650, 37660, 61609, 61611,<br>61612, 61680, 61682, 61684, 61686,<br>61690, 61692, 61697, 61698, 61700,<br>61702, 61703, 61705, 61710, 61711 |
| Usage of contrast media | 0.22, 0.23, 0.24, 0.45, 0.46,<br>0.47, 0.48, 0.52, 0.55, 0.59,<br>0.61, 0.62, 0.63, 0.65, 0.66,<br>35.96, 36.04, 36.06,<br>36.07, 37.22, 37.23, 37.33,<br>37.68, 88.41, 88.42, 88.43,<br>88.44, 88.45, 88.47, 88.48,<br>88.53, 88.54, 88.55, 88.56,<br>88.57                                                                                                                                                                                                                                                     | 34802, 34803, 34804, 34808, 34820,<br>34825, 34826, 34900, 35452, 35454,<br>35456, 35459, 35460, 35470, 35471,<br>35473, 35474, 35475, 35476, 35493,<br>35495, 36002, 36005, 36011, 36012,<br>36215, 36216, 36217, 36218, 36245,<br>36246, 36247, 36248, 36478, 36481,<br>37184, 37187, 37195, 37201, 37202,<br>37203, 37204, 37205, 37206, 37207,<br>37208, 37209, 37210, 37215, 75774,<br>92973, 92974, 92980, 92981, 92982,                                                                                                                                                                                                                                                                                                                                                                                                                                                                                                                                                                                                                                                                                                                                                                                                                                                                                                                                                |

|                      |                                    |                                                                                                                                                                                      |
|----------------------|------------------------------------|--------------------------------------------------------------------------------------------------------------------------------------------------------------------------------------|
|                      |                                    | 92984, 92986, 92997, 92998, 93508, 93510, 93526, 93527, 93529, 93531, 93532, 93539, 93540, 93541, 93542, 93543, 93544, 93545, 93555, 93556, 93568, 93580, 93581, 93609, G0290, G0291 |
| Obstetric procedures | 72.0-72.9, 73.00-73.99, 74.0-74.99 | 59510, 59514, 59515, 59620, 59525, 59618, 59622, 59610, 59612, 59614, 59400, 59410                                                                                                   |

**4. Examples for diagnosis and staging according to RIFLE, AKIN and KDIGO**

| Case     | Serum Creatinine (mg/dL)            |            |            |            |            | Baseline SCr | RRT        | AKI staging    |                |                |                |
|----------|-------------------------------------|------------|------------|------------|------------|--------------|------------|----------------|----------------|----------------|----------------|
|          | Mean pre-admission outpatient value | Day 1      | Day 2      | Day 3      | Day 7      |              |            | KDIGO          | RIFLE          | AKIN           | CK             |
| <b>A</b> | <b>1.0</b>                          | <b>1.0</b> | <b>1.1</b> | <b>1.2</b> | <b>2.0</b> | <b>1.0</b>   | <b>No</b>  | <b>Stage 2</b> | <b>Injury</b>  | <b>No AKI</b>  | <b>No AKI</b>  |
| <b>B</b> | <b>Not available</b>                | <b>2.2</b> | <b>2.0</b> | <b>2.5</b> | <b>3.0</b> | <b>2.0</b>   | <b>Yes</b> | <b>Stage 3</b> | <b>Risk</b>    | <b>Stage 3</b> | <b>Stage 2</b> |
| <b>C</b> | <b>Not available</b>                | <b>3.6</b> | <b>3.8</b> | <b>4.0</b> | <b>3.8</b> | <b>3.6</b>   | <b>No</b>  | <b>Stage 3</b> | <b>Stage 1</b> | <b>Stage 1</b> | <b>No AKI</b>  |

**5. Comparisons of incidence, in-hospital mortality, unadjusted and adjusted odds ratio for mortality, associated increase in length of stay and cost of acute kidney injury according to four definitions**

|                   | Incidence<br>(No. of Pats) | Mortality | OR for mortality* |             |                 |             | Median<br>increased LOS <sup>¶</sup> | Median<br>increased cost <sup>¶</sup> |
|-------------------|----------------------------|-----------|-------------------|-------------|-----------------|-------------|--------------------------------------|---------------------------------------|
|                   |                            |           | Unadjusted        | C statistic | Adjusted        | C statistic |                                      |                                       |
| <b>No AKI</b>     |                            |           |                   |             |                 |             |                                      |                                       |
| RIFLE             | 22070                      | 0.7%      | NA                | NA          | NA              | NA          | NA                                   | NA                                    |
| AKIN              | 21937                      | 0.7%      | NA                | NA          | NA              | NA          | NA                                   | NA                                    |
| KDIGO             | 21561                      | 0.6%      | NA                | NA          | NA              | NA          | NA                                   | NA                                    |
| CK                | 24191                      | 1.0%      | NA                | NA          | NA              | NA          | NA                                   | NA                                    |
| <b>AKI</b>        |                            |           |                   |             |                 |             |                                      |                                       |
| RIFLE             | 3789                       | 11.1%     | 17.3 (14.3-20.8)  | 0.80        | 2.9 (2.2-3.6)   | 0.96        | 2.9 (2.7-3.1)                        | 7.6 (6.9-8.3)                         |
| AKIN              | 3922                       | 10.8%     | 17.0 (14.1-20.5)  | 0.80        | 2.6 (2.0-3.3)   | 0.96        | 2.5 (2.3-2.7)                        | 6.6 (5.9-7.3)                         |
| KDIGO             | 4298                       | 10.3%     | 18.1 (14.9-22.0)  | 0.81        | 2.8 (2.2-3.6)   | 0.96        | 2.8 (2.6-2.9)                        | 7.1 (6.4-7.8)                         |
| CK                | 1668                       | 19.6%     | 23.3 (19.6-27.7)  | 0.76        | 5.2 (4.1-6.6)   | 0.96        | 2.8 (2.4-3.1)                        | 10.9 (9.3-12.5)                       |
| <b>AKI stages</b> |                            |           |                   |             |                 |             |                                      |                                       |
| RIFLE R           | 2592                       | 5.9%      | 8.6 (6.9-10.8)    |             | 2.0 (1.6-2.7)   |             | 2.6 (2.3-2.8)                        | 5.5 (4.8-6.3)                         |
| RIFLE I           | 742                        | 14.4%     | 23.4 (18.1-30.2)  | 0.82        | 3.5 (2.5-4.8)   | 0.96        | 4.0 (3.4-4.6)                        | 14.6(12.6-16.7)                       |
| RIFLE F           | 455                        | 35.4%     | 75.9 (59.3-97.3)  |             | 8.7 (6.1-12.4)  |             | 7.1 (6.1-8.1)                        | 33.3 (27.5-39.1)                      |
| AKIN 1            | 2708                       | 5.4%      | 8.0 (6.4-10.1)    |             | 1.8 (1.4-2.4)   |             | 2.1 (1.8-2.3)                        | 4.7 (3.9-5.5)                         |
| AKIN 2            | 723                        | 13.3%     | 21.5 (16.5-28.1)  | 0.82        | 3.1 (2.2-4.3)   | 0.96        | 3.9 (3.2-4.6)                        | 14.2 (12.1-16.2)                      |
| AKIN 3            | 491                        | 36.9%     | 82.1 (64.4-104.5) |             | 9.4 (6.6-13.4)  |             | 6.5 (5.5-7.4)                        | 29.5 (23.7-35.2)                      |
| KDIGO 1           | 3061                       | 5.3%      | 8.9 (7.0-11.2)    |             | 2.0 (1.5-2.7)   |             | 2.5 (2.3-2.7)                        | 5.4 (4.7-6.1)                         |
| KDIGO 2           | 723                        | 13.4%     | 24.4 (18.6-32.1)  | 0.83        | 3.4 (2.4-4.9)   | 0.96        | 4.2 (3.5-4.9)                        | 15.2 (13.3-17.2)                      |
| KDIGO 3           | 514                        | 35.4%     | 86.4 (67.4-110.6) |             | 10.1 (7.1-14.4) |             | 6.4 (5.3-7.5)                        | 27.3 (22.6-32.0)                      |
| CK 1              | 929                        | 11.5%     | 12.4 (9.8-15.7)   |             | 3.3 (2.5-4.5)   |             | 2.3 (1.9-2.7)                        | 7.2 (5.9-8.5)                         |
| CK 2              | 514                        | 26.1%     | 33.6 (26.6-42.5)  | 0.76        | 7.8 (5.7-10.7)  | 0.96        | 3.3 (2.6-4.1)                        | 15.5 (12.0-19.0)                      |
| CK3               | 225                        | 38.2%     | 59.0 (43.9-79.4)  |             | 9.7 (6.4-14.7)  |             | 5.3 (3.5-7.1)                        | 25.5 (20.2-30.8)                      |

\* Results show odds ratios with 95% confidence intervals from logistic regression models with reference to no AKI. Adjusted model is adjusted for age, gender, race, procedures, diagnoses, DRG weights, and laboratory values including estimated glomerular filtration rate.

¶ Results show the increase in length of stay and costs in acute kidney injury (AKI) vs. no acute kidney injury, using multivariable adjusted quantile regression models adjusting for age, gender, race, procedures, diagnoses, laboratory values including estimated glomerular filtration rate and DRG weights. Values represent the increase in days or 1,000 USD in those with AKI versus no AKI.
